# Supplementary material for: Polypyrrole–Tungsten Oxide Nanocomposite Fabrication through Laser-Based Techniques for an Ammonia Sensor: Achieving Room Temperature Operation
Source: MDPI journal article supplement (doi:10.3390/polym16010079), 2023-12-26
Supplement: s1 [file s1]

# Polypyrrole–Tungsten Oxide Nanocomposite Fabrication through Laser-Based Techniques for an Ammonia Sensor: Achieving Room Temperature Operation

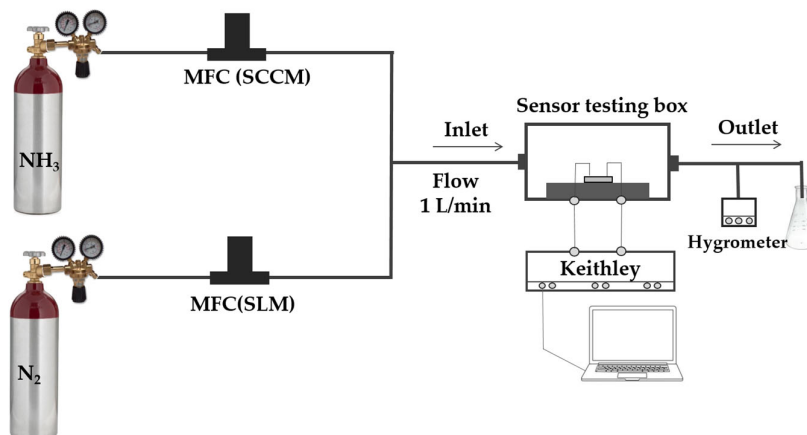

**Figure S1.** Sketch of the sensor testing setup. MFC = Mass Flow Controller; SLM = Standard Liter per Minute; SCCM = Standard Cubic Centimeter per Minute.

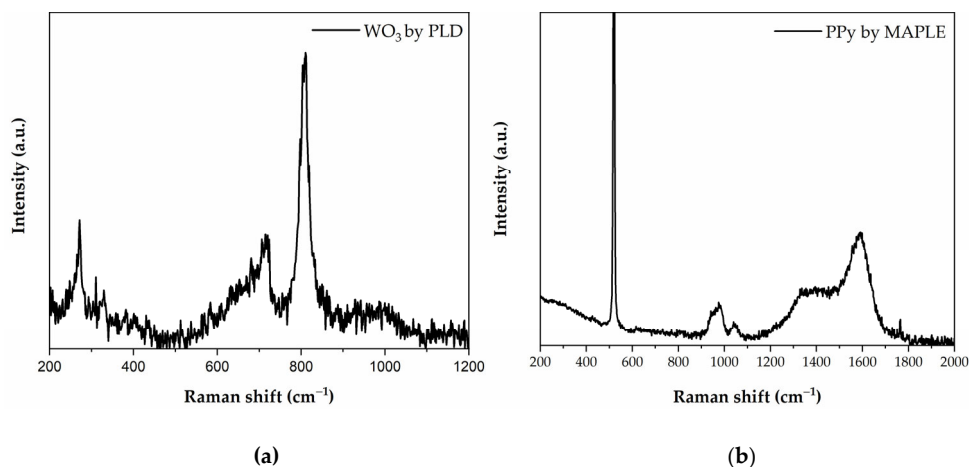

**Figure S2.** (a) Raman spectra of WO<sub>3</sub> sensing layer obtained by PLD. (b) Raman spectra of a PPy sensing layer obtained by MAPLE.

**Table S1.** Contact angle measurements carried out on the active layers obtained by laser-methods.

| Layer                  | m1    | m2    | m3    | m4    | m5    | Average      |
|------------------------|-------|-------|-------|-------|-------|--------------|
| WO <sub>3</sub> by PLD | 41.38 | 41.61 | 41.82 | 45.26 | 45.68 | <b>43.15</b> |
| PPy by MAPLE           | 47.42 | 47.44 | 47.41 | 47.55 | 47.57 | <b>47.45</b> |
| WO <sub>3</sub> /PPy   | 63.67 | 66.12 | 63.61 | 63.82 | 67.42 | <b>64.92</b> |
